# Supplementary material for: Effect of NCOR1 Mutations on Immune Microenvironment and Efficacy of Immune Checkpoint Inhibitors in Patient with Bladder Cancer
Source: PubMed Central journal article supplement (PMC7982737; doi:10.3389/fimmu.2021.630773), 2021-03-08
Supplement: Image_2.pdf [file Image_2.pdf]

### A ICI-treated BLCA

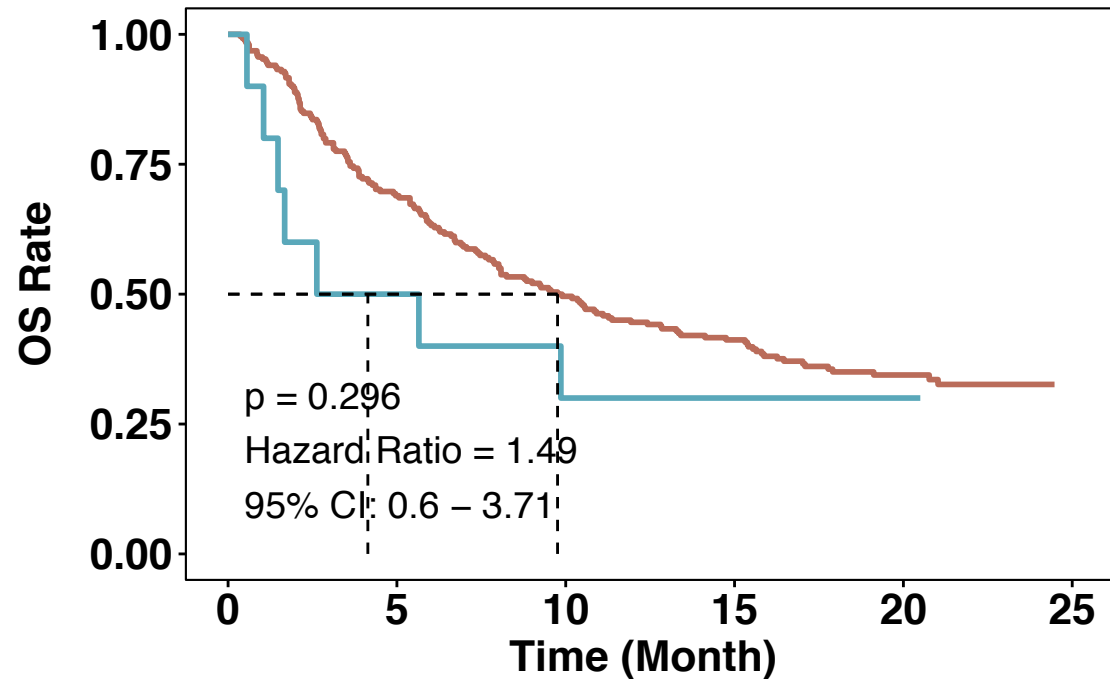

#### Number at risk

|                   |     |     |     |    |    |   |
|-------------------|-----|-----|-----|----|----|---|
| Non-Altered(254)  | 254 | 169 | 119 | 93 | 55 | 0 |
| NCOR1-Altered(10) | 10  | 5   | 3   | 3  | 1  | 0 |

### B TCGA-BLCA

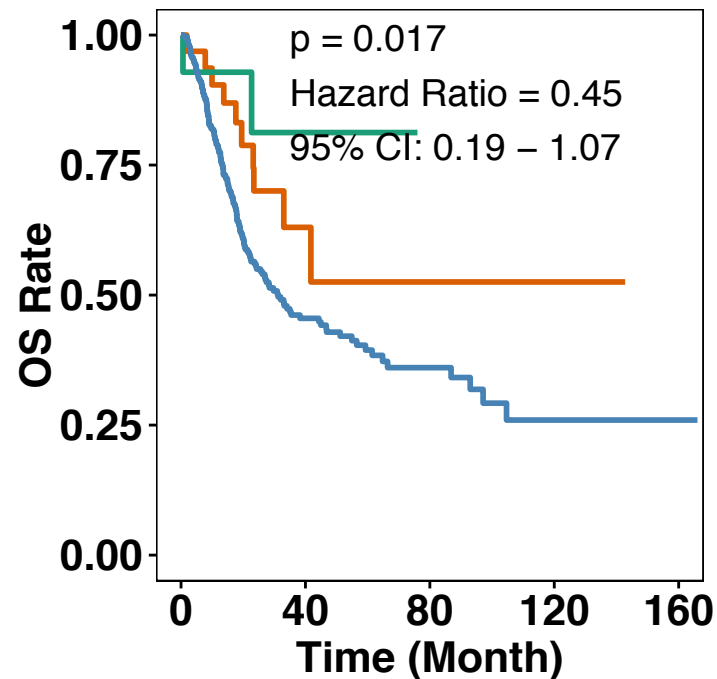

#### Number at risk

|               |     |    |    |   |   |
|---------------|-----|----|----|---|---|
| NCOR1-MT(34)  | 34  | 6  | 2  | 2 | 0 |
| NCOR1-DEL(14) | 14  | 5  | 0  | 0 | 0 |
| Other(359)    | 359 | 70 | 20 | 4 | 3 |
