# Supplementary material for: Effect of NCOR1 Mutations on Immune Microenvironment and Efficacy of Immune Checkpoint Inhibitors in Patient with Bladder Cancer
Source: PubMed Central journal article supplement (PMC7982737; doi:10.3389/fimmu.2021.630773), 2021-03-08
Supplement: Table_1.pdf [file Table_1.pdf]

S Table A1. List of genes included in DNA damage response (DDR) gene set used for Comparison Analysis (MsiDB)

| Pathway                                                | Gene Set                                                                                                                                                                                                                                                                                                                                                                    |
|--------------------------------------------------------|-----------------------------------------------------------------------------------------------------------------------------------------------------------------------------------------------------------------------------------------------------------------------------------------------------------------------------------------------------------------------------|
| BER(R-HSA-73884_REACTOME_Base_Excision_Repair)         | CCNO; POLD3; FEN1; SMUG1; APEX1; LIG1; LIG3; MPG; MUTYH; NTHL1; OGG1; PCNA; POLB; POLD1; POLD2; POLD4; TDG; XRCC1; MBD4                                                                                                                                                                                                                                                     |
| DSB(R-HSA-5696398_REACTOME_Double-Strand_Break_Repair) | RAD50; XRCC6; H2AFX; LOC389901; LIG1; LIG4; MRE11A; NBN; ATM; TDP1; PRKDC; RAD51; RAD52; RPA1; RPA2; RPA3; LOC651610; BRCA1; BRCA2; TP53BP1; XRCC4; XRCC5; BRIP1; MDC1                                                                                                                                                                                                      |
| FA(R-HSA-6783310_REACTOME_Fanconi_Anemia_Pathway)      | FANCA; FANCC; FANCD2; FANCE; FANCB; FANCF; FANCG; ZBTB32; UBE2T; ATM; ATR; FANCL; FANCM; RPS27A; LOC648152; LOC651610; LOC651921; BRCA1; BRCA2; RPS27AP11; UBA52; RPS27AP11; USP1; PALB2; C17orf70; C19orf40                                                                                                                                                                |
| HR(hsa03440_KEGG_Homologous_Recombination)             | RAD50; H2AFX; LIG1; MRE11A; NBN; ATM; RAD51; RAD52; RPA1; RPA2; RPA3; LOC651610; BRCA1; BRCA2; TP53BP1; BRIP1; MDC1; RAD50; POLD3; EME1; RAD54B; RPA4; MRE11A; NBN; POLD1; POLD2; POLD4; RAD51; RAD51C; RAD51B; RAD51D; RAD52; RPA1; RPA2; RPA3; BLM; SSBP1; BRCA2; TOP3A; XRCC2; XRCC3; SHFM1; MUS81; RAD54L; TOP3B                                                        |
| MMR(hsa03430_KEGG_Mismatch_Repair)                     | POLD3; MLH3; MSH6; RPA4; LIG1; MLH1; MSH2; MSH3; PCNA; PMS2; POLD1; POLD2; POLD4; RFC1; RFC2; RFC3; RFC4; RFC5; RPA1; RPA2; RPA3; SSBP1; EXO1                                                                                                                                                                                                                               |
| NER(R-HSA-5696398_REACTOME_Nucleotide_Excision_Repair) | CDK7; POLD3; ERCC8; DDB1; DDB2; ERCC1; ERCC2; ERCC3; ERCC4; ERCC5; ERCC6; GTF2H1; GTF2H2; GTF2H3; GTF2H4; LIG1; MNAT1; PCNA; POLD1; POLD2; POLE; POLE2; POLR2A; POLR2B; POLR2C; POLR2D; POLR2E; POLR2F; POLR2G; POLR2H; POLR2I; POLR2J; POLR2K; POLR2L; XAB2; POLD4; RAD23B; RFC2; RFC3; RFC4; RFC5; RPA1; RPA2; RPA3; LOC652672; LOC652857; GTF2H2B; TCEA1; XPA; XPC; CCNH |
| NHEJ(hsa03450_KEGG_Non_Homologous_End_Joining)         | RAD50; DNNT; FEN1; XRCC6; POLL; POLM; LIG4; MRE11A; PRKDC; DCLRE1C; LOC731751; XRCC4; XRCC5; NHEJ1                                                                                                                                                                                                                                                                          |
| SSB(GO:0003697_Single-Stranded_DNA_Binding)            | ERCC1; ERCC4; ERCC5; FUBP1; HMGB2; HNRNPA1; HNRNPA2B1; HNRPDL; IGHMBP2; MLH1; MSH2; MSH3; MYT2; PCBP1; PMS2; POT1; PURA; PURB; RAD23A; RAD23B; RAD51; RAD51AP1; RBMS1; RPA1; RPA2; RPA3; RPA4; SUB1; TERF2; TERF2IP; TP53; TREX1; WBP11; XPC; YBX1                                                                                                                          |

|             |                                                                                                                                                                                                                                                                                                                                                                                                                                                                                                                                                                                                                                                                                                                                                                                                                                                                                                                                                                                                                                                                                                                                                                                                                                                                                                                                                                                                                                                        |
|-------------|--------------------------------------------------------------------------------------------------------------------------------------------------------------------------------------------------------------------------------------------------------------------------------------------------------------------------------------------------------------------------------------------------------------------------------------------------------------------------------------------------------------------------------------------------------------------------------------------------------------------------------------------------------------------------------------------------------------------------------------------------------------------------------------------------------------------------------------------------------------------------------------------------------------------------------------------------------------------------------------------------------------------------------------------------------------------------------------------------------------------------------------------------------------------------------------------------------------------------------------------------------------------------------------------------------------------------------------------------------------------------------------------------------------------------------------------------------|
| DDR(merged) | CCNO; POLD3; FEN1; SMUG1; APEX1; LIG1; LIG3; MPG; MUTYH;<br>NTHL1; OGG1; PCNA; POLB; POLD1; POLD2; POLD4; TDG; XRCC1;<br>MBD4; TCEA1; ERCC8; LOC652857; RPA3; RPA3; DDB2; POLR2E;<br>POLR2H; RFC2; XPA; RFC3; ERCC1; RPA2; RPA2; CCNH; XAB2;<br>ERCC6; POLE; ERCC2; RAD23B; POLR2J; POLR2G; DDB1; ERCC5;<br>RPA1; RPA1; LOC652672; GTF2H2; POLR2B; ERCC4; POLR2L;<br>POLR2A; RFC4; GTF2H1; ERCC3; RFC5; GTF2H4; GTF2H2B;<br>POLR2D; POLR2I; CDK7; GTF2H3; POLE2; XPC; POLR2C; MNAT1;<br>POLR2K; POLR2F; MSH3; MSH2; SSBP1; RFC1; EXO1; MLH1; RPA4;<br>PMS2; MSH6; MLH3; PCBP1; PURB; ERCC1; HMGB2; IGHMBP2;<br>RBMS1; RAD23B; HNRNPA2B1; TP53; ERCC5; TERF2IP; PURA;<br>TREX1; ERCC4; WBP11; POT1; RAD51AP1; MYT2; RAD23A;<br>HNRPDL; XPC; FUBP1; RAD51; RAD51; SUB1; HNRNPA1; YBX1;<br>TERF2; RAD50; RAD50; H2AFX; LIG4; PRKDC; XRCC4; LOC651610;<br>NBN; NBN; XRCC6; BRIP1; RAD52; RAD52; TP53BP1; BRCA1;<br>MRE11A; MRE11A; MDC1; TDP1; LIG1; BRCA2; BRCA2; LOC389901;<br>ATM; XRCC5; RAD54L; SHFM1; POLD3; TOP3A; XRCC3; POLD4;<br>RAD51B; SSBP1; TOP3B; RAD51D; MUS81; POLD1; EME1; RPA4;<br>RAD54B; RAD51C; XRCC2; BLM; POLD2; LIG4; PRKDC; NHEJ1;<br>XRCC4; FEN1; POLM; XRCC6; DNNTT; LOC731751; POLL; DCLRE1C;<br>XRCC5; FANCA; FANCC; FANCD2; FANCE; FANCB; FANCF; FANCG;<br>ZBTB32; UBE2T; ATM; ATR; FANCL; FANCM; RPS27A; LOC648152;<br>LOC651610; LOC651921; BRCA1; BRCA2; RPS27AP11; UBA52;<br>RPS27AP11; USP1; PALB2; C17orf70; C19orf40 |
|-------------|--------------------------------------------------------------------------------------------------------------------------------------------------------------------------------------------------------------------------------------------------------------------------------------------------------------------------------------------------------------------------------------------------------------------------------------------------------------------------------------------------------------------------------------------------------------------------------------------------------------------------------------------------------------------------------------------------------------------------------------------------------------------------------------------------------------------------------------------------------------------------------------------------------------------------------------------------------------------------------------------------------------------------------------------------------------------------------------------------------------------------------------------------------------------------------------------------------------------------------------------------------------------------------------------------------------------------------------------------------------------------------------------------------------------------------------------------------|
