# Supplementary material for: Effect of NCOR1 Mutations on Immune Microenvironment and Efficacy of Immune Checkpoint Inhibitors in Patient with Bladder Cancer
Source: PubMed Central journal article supplement (PMC7982737; doi:10.3389/fimmu.2021.630773), 2021-03-08
Supplement: Table_2.pdf [file Table_2.pdf]

|                    | <b>NCOR1-MT<br/>(N=15)</b> | <b>NCOR1-WT<br/>(N=195)</b> | <b>Overall<br/>(N=210)</b> |
|--------------------|----------------------------|-----------------------------|----------------------------|
| <b>MSI_score</b>   |                            |                             |                            |
| Mean (SD)          | 2.60 (6.39)                | 1.40 (4.44)                 | 1.48 (4.60)                |
| Median [Min, Max]  | 0.300 [0, 22.7]            | 0.320 [0, 41.3]             | 0.315 [0, 41.3]            |
| <b>Age</b>         |                            |                             |                            |
| Mean (SD)          | 67.8 (14.7)                | 67.1 (10.0)                 | 67.1 (10.4)                |
| Median [Min, Max]  | 71.0 [32.0, 89.0]          | 68.0 [39.0, 86.0]           | 68.0 [32.0, 89.0]          |
| <b>TMB_Score</b>   |                            |                             |                            |
| Mean (SD)          | 19.6 (18.3)                | 12.9 (17.9)                 | 13.4 (18.0)                |
| Median [Min, Max]  | 14.9 [2.95, 71.8]          | 7.90 [0.878, 210]           | 8.78 [0.878, 210]          |
| <b>Gender</b>      |                            |                             |                            |
| Female             | 3 (20.0%)                  | 48 (24.6%)                  | 51 (24.3%)                 |
| Male               | 12 (80.0%)                 | 147 (75.4%)                 | 159 (75.7%)                |
| <b>Drug_Type</b>   |                            |                             |                            |
| Combo              | 1 (6.7%)                   | 22 (11.3%)                  | 23 (11.0%)                 |
| PD-1/PDL-1         | 14 (93.3%)                 | 173 (88.7%)                 | 187 (89.0%)                |
| <b>Sample_Type</b> |                            |                             |                            |
| Metastasis         | 3 (20.0%)                  | 86 (44.1%)                  | 89 (42.4%)                 |
| Primary            | 12 (80.0%)                 | 109 (55.9%)                 | 121 (57.6%)                |
